# Supplementary material
Source: Research Square preprint supplement (doi:10.21203/rs.3.rs-9195081/v1)
Supplement: Supplementary file 1 [file 1e470aab59ee03604c2ac4c5.docx]

Supplementary file: Interview Guide: "Barriers and Facilitators to Delirium Management among ICU Nurses"

(Translated from Chinese)

1. Participant background information

Before the interview, participants were asked to complete a brief demographic form, including age, gender, highest educational level, professional title, current role, years of ICU experience, ICU type, previous delirium-related training, and whether a standardised delirium management protocol was available in their unit.

2. Opening and warm-up questions

How long have you worked in the ICU? What are the characteristics of your current shift or role (e.g. number of patients under your care, teaching responsibilities, or whether you often care for awake patients)?

Can you describe the most recent delirious patient you cared for in the ICU? How did you feel about that experience overall?

3. Main interview questions

Capability

How would you describe your ability to care for patients with delirium? What do you find most difficult?

How confident are you in making judgments and managing patients with delirium? How do you deal with uncertainty?

From the perspective of physical and mental energy, how does delirium care affect you?

What kinds of training or tools would help you most in delirium care?

Opportunity

In teamwork and collaboration, what factors influence your delirium care?

How do the ICU physical environment and available resources (e.g. equipment, bed layout, monitoring systems, staffing, time arrangements) affect your management of patients with delirium?

What support would you like your ward or hospital to provide?

Motivation

What emotional experiences do you usually have when caring for patients with delirium?

How important do you think delirium care is in your daily work?

What would increase your motivation to provide delirium care?

Compared with when you first started working in the ICU, how have your feelings and attitudes towards delirium care changed?

4. Closing question

Is there anything else you would like to add that we have not discussed?
