# Supplementary material
Source: Research Square preprint supplement (doi:10.21203/rs.3.rs-9195081/v1)
Supplement: Supplementary file 2 [file f5d95fa44d8b278b0cf928f7.docx]

**Appendix A:COREQ Checklist**

|  | COREQ Item | Answer |
| --- | --- | --- |
| Domain 1: Research Team and Reflexivity | | |
| 1 | Interviewer/facilitator- Which author/s conducted the interview or focus group? | YC and YG |
| 2 | Credentials-What were the researcher’s credentials? E.g., PhD, MD | YC- MD  YG-PhD  RY-RN,PhD  XL-RN  XyL-MD  XW-MD  XG-**Professor**‌  XS- **Associate Professor**‌ |
| 3 | Occupation-What was their occupation at the time of the study? | Clinical nursing, nursing education, research, medical practice. |
| 4 | Gender-Was the researcher male or female? | YC- Male  YG-Female  RY-Female  XL-Female  XyL-Female  XW-Female  XG-Female  XS-Female |
| 5 | Experience and training-What experience or training did the researcher have? | YC-Novice  YG-Extensive research experience  RY-Experienced  XL-Experienced  XyL-Extensive research experience  XW-Extensive research experience  XG-Extensive research experience  XS-Extensive research experience |
| 6 | Relationship established-Was a relationship established prior to study commencement? | YC-No relationships  YG-No relationships  RY-Work Colleague  XL-No relationships  XyL-No relationships  XW-No relationships  XG-Work Colleague  XS-Work Colleague |
| 7 | Participant knowledge of the interviewer-What did the participants know about the researcher? e.g., personal goals, reasons for doing the research. | YC explained to the participants the goal of research- as a professional development initiative for XG and to facilitate nursing practice in ICU. |
| 8 | Interviewer characteristics-What characteristics were reported about the interviewer/facilitator? e.g. Bias, assumptions, reasons and interests in the research topic. | YC had prior qualitative interview experience and a professional interest in ICU delirium assessment and management. The study was guided by the COM-B framework. Specific biases, assumptions, and reflexive characteristics were not explicitly reported. |
| Domain 2: Study Design | | |
| 9 | Methodological orientation and Theory-What methodological orientation was stated to underpin the study? e.g., grounded theory, discourse analysis, ethnography, phenomenology, content analysis | A qualitative descriptive exploratory (QDE) methodology was used. The study was guided by the Capability, Opportunity and Motivation model of Behaviour change (COM-B). |
| 10 | Sampling-How were participants selected? e.g., purposive, convenience, consecutive, snowball | Purposive sampling was used to recruit nurses with diverse clinical experience, educational qualifications, and ICU backgrounds. |
| 11 | Method of approach-How were participants approached? e.g., face-to-face, telephone, mail, email | Participants were initially approached via telephone to invite their participation, and subsequent face-to-face interviews were conducted with the willing participants in person. |
| 12 | Sample size-How many participants were in the study? | 14 participants. |
| 13 | Non-participation-How many people refused to participate or dropped out? Reasons? | None- all participants who provided consent participated in the study. |
| 14 | Setting of data collection-Where was the data collected? e.g., home, clinic, workplace | Workplace |
| 15 | Presence of non-participants-Was anyone else present besides the participants and researchers? | No |
| 16 | Description of sample-What are the important characteristics of the sample? e.g., demographic data, date | **Registered ICU nurses, males and females, participants with bachelor’s and master’s degrees, and participants with varied ICU work experience across comprehensive, emergency, and respiratory ICU settings.** |
| 17 | Interview guide-Were questions, prompts, guides provided by the authors? Was it pilot tested? | Yes. A semi-structured interview guide based on the COM-B model was developed by the research team and pilot-tested with nurses of similar clinical backgrounds |
| 18 | Repeat interviews-Were repeat interviews carried out? If yes, how many? | No |
| 19 | Audio/visual recording-Did the research use audio or visual recording to collect the data? | Yes. Interviews were audio-recorded. |
| 20 | Field notes-Were field notes made during and/or after the interview or focus group? | No |
| 21 | Duration-What was the duration of the interviews or focus group? | Interviews lasted between 24 and 37 minutes. |
| 22 | Data saturation-Was data saturation discussed? | Yes- the two interviewers discussed data saturation. |
| 23 | Transcripts returned-Were transcripts returned to participants for comment and/or correction? | **Transcripts were not returned to participants for comment or correction, as all recordings were clear and complete.** |
| Domain 3: Analysis and Findings | | |
| 24 | Number of data coders-How many data coders coded the data? | Three researchers coded the data and generated themes. |
| 25 | Description of the coding tree -Did authors provide a description of the coding tree? | Yes- the codebook contains description of the codes. |
| 26 | Derivation of themes-Were themes identified in advance or derived from the data? | Major themes were identified in advance from the three elements of the COM-B model i.e., capability, opportunity, and motivation. Minor themes were then inductively identified from the data. |
| 27 | Software-What software, if applicable, was used to manage the data? | YC used NVIVO version 12 for coding. |
| 28 | Participant checking-Did participants provide feedback on the findings? | No |
| 29 | Quotations presented-Were participant quotations presented to illustrate the themes/findings? Was each quotation identified? e.g., participant number | Yes, to both. |
| 30 | Data and findings consistent-Was there consistency between the data presented and the findings? | Yes |
| 31 | Clarity of major themes-Were major themes clearly presented in the findings? | Yes |
| 32 | Clarity of minor themes-Is there a description of diverse cases or discussion of minor themes? | Yes |
